# Supplementary material for: The Impact of Implementation of Palliative, Non-Operative Management on Mortality of Operatively Treated Geriatric Hip Fracture Patients: A Retrospective Cohort Study
Source: MDPI journal article supplement (doi:10.3390/jcm13072012), 2024-03-29
Supplement: s1 [file s1]

## Shared decision-making in hip fracture patients

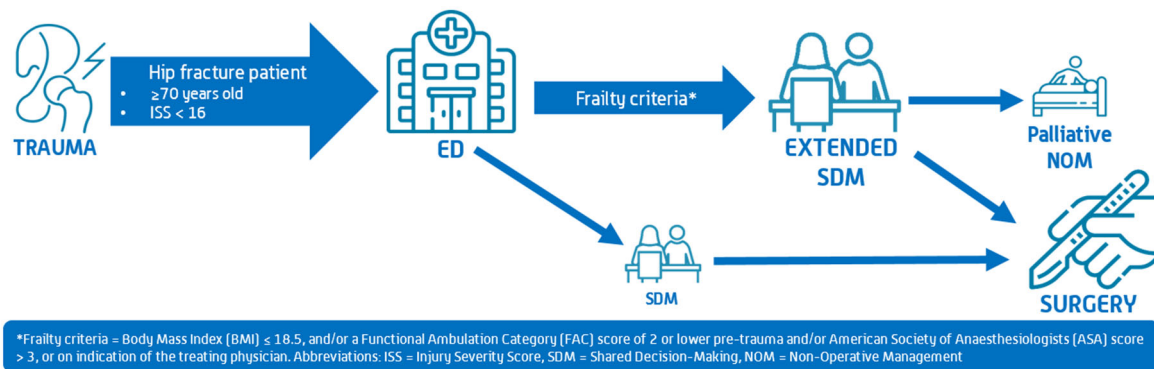

**Figure S1.** Renewed hip fracture pathway for geriatric patients.
